# Supplementary material
Source: Springer Nature journal article supplement (https://www.springermedizin.de/resource/supplementary/12979_2010_253_MOESM1_ESM.pdf/9603336)

**A**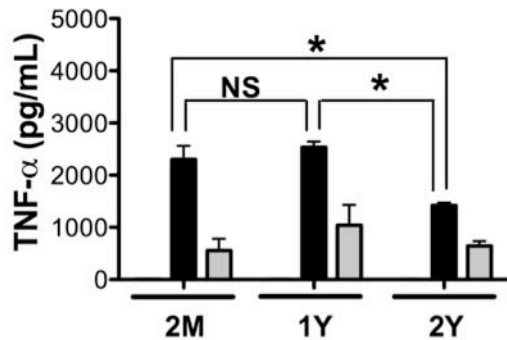**B**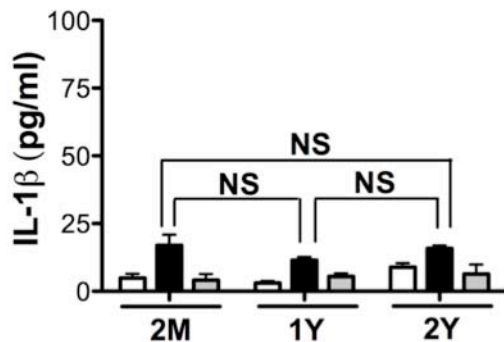**C**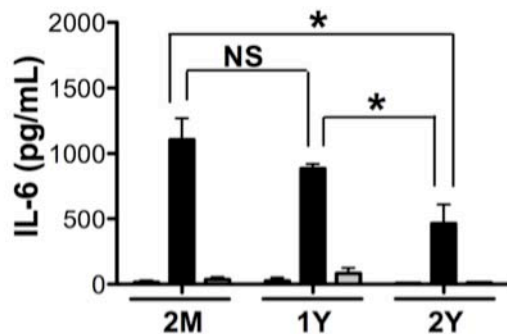**D**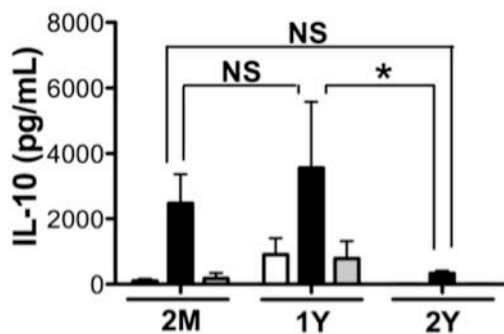

Supplement: MOESM1 [file 9603336]
